# Supplementary material for: The molecular mechanism and evolutionary divergence of caspase 3/7-regulated gasdermin E activation
Source: eLife journal article supplement (doi:10.7554/elife.89974), 2023-08-14
Supplement: fig1-data3 [file Numerical data from all bar graphs shown in Figure 1.xlsx]

## Sheet: Sheet1
Fig. 1D
	TrCASP3 activtiy （OD450）
	YVAD	VDQQD	DEVD	VEID	IETD	LEHD
	0.002667	0.157333	0.450667	0.126667	0.034667	0.049333
	0.010667	0.153333	0.474667	0.146667	0.030667	0.053333
	0.006667	0.161333	0.486667	0.122667	0.014667	0.053333
	TrCASP7 activtiy （OD450）
	YVAD	VDQQD	DEVD	VEID	IETD	LEHD
	0.002667	0.001333	0.330667	0.006667	0.002667	0.009333
	0.002667	0.001333	0.290667	0.014667	0.006667	0.017333
	0.006667	0.005333	0.330667	0.010667	0.002667	0.009333
Fig. 1E
	TrCASP3 activtiy （OD450）
	Time/min	0.25U	0.5U	1U	2U	4U	8U
	0	0.000200002	0.0015	0.0066	0.0061	0.0094	0.0159
	5	0.0031	0.0056	0.0142	0.0224	0.035	0.072
	10	0.0057	0.0101	0.0256	0.043	0.0689	0.1356
	15	0.009	0.0168	0.0377	0.0647	0.1011	0.1976
	20	0.011	0.0215	0.0482	0.0846	0.1344	0.2504
	25	0.0143	0.0274	0.0599	0.1059	0.166	0.2968
	30	0.0166	0.032	0.0712	0.1261	0.1948	0.3326
	35	0.0193	0.0375	0.0835	0.1459	0.2204	0.359
	40	0.0233	0.0439	0.0959	0.1669	0.2474	0.38
	45	0.0264	0.0508	0.1083	0.1854	0.273	0.3946
	50	0.0299	0.0561	0.1202	0.2039	0.2937	0.4045
	55	0.0318	0.0611	0.1307	0.22	0.3124	0.4101
	60	0.0353	0.0682	0.1427	0.237	0.328	0.4145
	TrCASP7 activtiy （OD450）
	Time/min	0.25U	0.5U	1U	2U	4U	8U
	0	0.0029	0.005	0.0074	0.0112	0.0246	0.046
	5	0.0077	0.0148	0.0258	0.0494	0.1014	0.2046
	10	0.0128	0.0261	0.0477	0.0923	0.1821	0.3444
	15	0.0193	0.0398	0.0728	0.1383	0.2608	0.4194
	20	0.0263	0.0539	0.0992	0.1847	0.3281	0.4389
	25	0.0323	0.0682	0.1268	0.2286	0.3771	0.4409
	30	0.038	0.0822	0.1525	0.2688	0.407	0.4415
	35	0.0441	0.0953	0.1756	0.3036	0.4204	0.4407
	40	0.0504	0.1094	0.1999	0.3356	0.4267	0.4406
	45	0.0572	0.123	0.223	0.3615	0.4296	0.4409
	50	0.0631	0.1361	0.2443	0.3807	0.4301	0.4406
	55	0.0692	0.1486	0.2644	0.3941	0.4296	0.4396
	60	0.0755	0.1612	0.2827	0.404	0.4296	0.4391
