# Supplementary material for: The molecular mechanism and evolutionary divergence of caspase 3/7-regulated gasdermin E activation
Source: eLife journal article supplement (doi:10.7554/elife.89974), 2023-08-14
Supplement: fig2-data3 [file Numerical data from all bar graphs shown in Figure 2.xlsx]

## Sheet: Sheet1
Fig. 2C
	LDH release （％）
	Vector	FL	CT	NT
	5.10799	9.63183	2.58116	78.1415
	1.96983	10.2839	6.0046	88.2081
	1.92907	9.06125	11.9956	84.4586
		Unpaired t test
		Comparison		p value	Summary
		Vector vs. NT		<0.0001	***
Fig. 2F
	Fluorescence Intensity
	Vector	TrCASP3	TrCASP3
	127	20408	36995
	322	16230	39646
	141	31640	43106
	Unpaired t test
	Comparison		P value	Summary
	Vector vs. TrCASP3		0.008	**
	Vector vs. TrCASP7		<0.0001	***
Fig. 2H
	LDH release (％)
	Vector	TrGSDME	TrCASP3	TrCASP3+TrGSDME		TrCASP7	TrCASP7+TrGSDME
	3.06593	2.60489	3.61918	35.7538		11.2264	43.8681
	3.94191	0.299677	11.4569	26.1641		12.3264	44.5136
	0.43799	5.04841	4.08022	23.1674		8.2296	47.6948
	Unpaired t test
		Comparison			P value	Summary
	Vector vs. TrCASP3+TrGSDME				0.0028	**
	Vector vs. TrCASP7+TrGSDME				<0.0001	***
Fig. 2K
	LDH release (％)
	A	B	C	D	E	F	G
	20.6897	55.9387	31.8008	32.8225	73.3078	31.6731	30.2682
	24.3934	52.235	30.5236	24.6488	76.8838	31.0345	33.8442
	21.4559	51.5964	32.8225	30.0128	77.6501	34.2273	34.4828
				A:TrGSDME
	Unpaired t test			B:TrGSDME + TrCASP3
	Comparison	P value	Summary	C:Z-DEVD-FMK + TrGSDME +TrCASP3
	B vs. C	0.0001	***	D:Z-VAD-FMK + TrGSDME +TrCASP3
	B vs. D	0.0009	***	E:TrGSDME + TrCASP7
	E vs. F	<0.0001	***	F:Z-DEVD-FMK + TrGSDME +TrCASP7
	E vs. G	<0.0001	***	G:Z-VAD-FMK + TrGSDME +TrCASP7
Fig. 2M
	LDH release (％)
		WT			D255R
	Control	11.3806	9.64147	13.2113	9.32568	4.05794	6.80394
	TrCASP3	42.6849	29.8703	38.1998	10.0991	16.0488	14.4927
	TrCASP7	39.4813	44.9733	44.0579	12.2044	17.5133	18.2456
		D258A
	Control	7.17007	9.91606	9.64147
	TrCASP3	12.8451	15.6827	14.9504
	TrCASP7	20.3509	18.1541	18.9779
	Multiple t test
	Comparison				P value	Summary
	WT+TrCASP3 vs. D255R+TrCASP3				5e-06	***
	WT+TrCASP7 vs. D255R+TrCASP7				1e-06	***
	WT+TrCASP3 vs. D258A+TrCASP3				2e-06	***
	WT+TrCASP7 vs. D258A+TrCASP7				<0.000001	***
