# Supplementary material for: The molecular mechanism and evolutionary divergence of caspase 3/7-regulated gasdermin E activation
Source: eLife journal article supplement (doi:10.7554/elife.89974), 2023-08-14
Supplement: fig3-data3 [file Numerical data from bar graph shown in Figure 3.xlsx]

## Sheet: Sheet1
Fig. 3B
	Caspase activtiy （OD450）
		DAVD			DMPD
	HsCSAP3	0.108	0.101	0.101	0.144	0.165	0.159
	HsCSAP7	0.121	0.119	0.118	0.163	0.15	0.166
	TrCSAP3	0.036	0.034	0.035	0.173	0.17	0.171
	TrCSAP7	0.13	0.137	0.138	0.159	0.174	0.174
