# Supplementary material for: The molecular mechanism and evolutionary divergence of caspase 3/7-regulated gasdermin E activation
Source: eLife journal article supplement (doi:10.7554/elife.89974), 2023-08-14
Supplement: fig3-figsupp2-data1 [file Numerical data from bar graph shown in Figure 3-figure supplement 2 .xlsx]

## Sheet: Sheet1
Fig.3-figure supplement 2
	TrCASP1
	YVAD	DAVD	DMPD
	0.156	0.03	0.034
	0.149	0.0287	0.029
	0.169	0.023	0.025
