# Supplementary material for: The molecular mechanism and evolutionary divergence of caspase 3/7-regulated gasdermin E activation
Source: eLife journal article supplement (doi:10.7554/elife.89974), 2023-08-14
Supplement: fig4-data3 [file Numerical data from bar graph shown in Figure 4.xlsx]

## Sheet: Sheet1
Fig. 4C
	Caspase activtiy （OD450）
		DAVD			DMPD
	HsCSAP7	0.121	0.119	0.118	0.163	0.15	0.166
	TrCSAP7	0.156	0.163	0.163	0.168	0.184	0.184
	Hsp20-Trp10	0.093	0.114	0.123	0.174	0.192	0.196
	Trp20-Hsp20	0.198	0.15	0.195	0.118	0.138	0.134
