# Supplementary figures and images for: The molecular mechanism and evolutionary divergence of caspase 3/7-regulated gasdermin E activation
Source: eLife journal article supplement (doi:10.7554/elife.89974), 2023-08-14

**Figure 1-figure supplement 2**

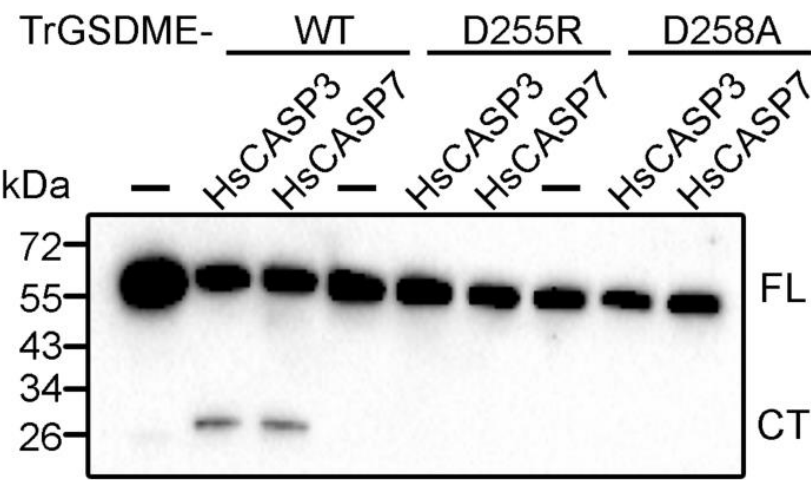

**anti-His**

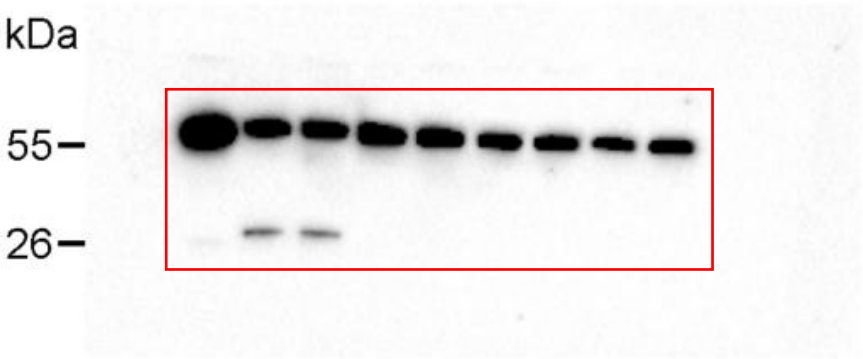

Supplement: fig1-figsupp2-data2 [file elife-89974-fig1-figsupp2-data2-v1.zip]

**Figure 2-figure supplement 3C**

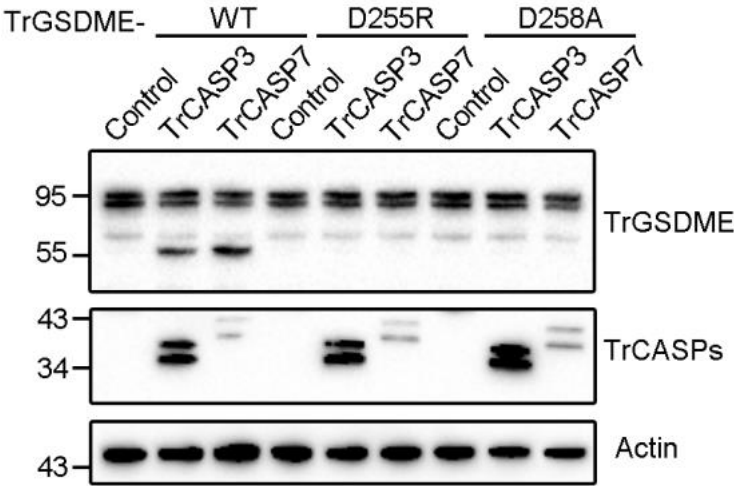

**anti-mCherry**

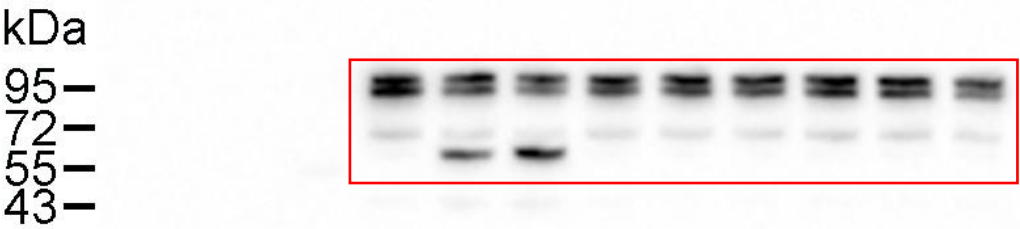

**anti-Myc**

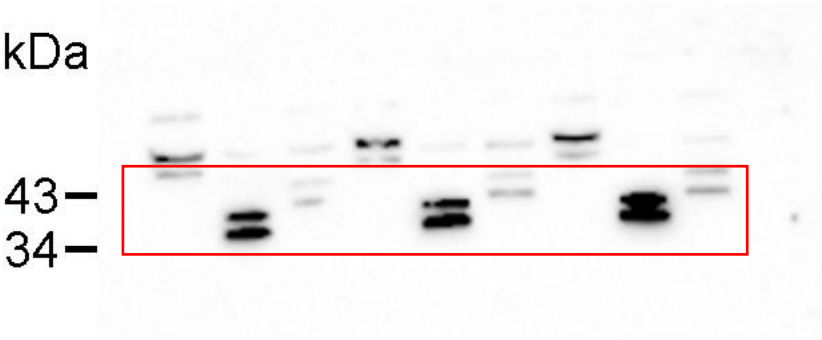

**anti-actin**

kDa

43—

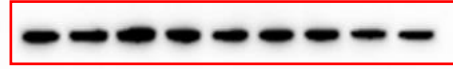

Supplement: fig2-figsupp3-data2 [file elife-89974-fig2-figsupp3-data2-v1.zip]

**Figure 3G**

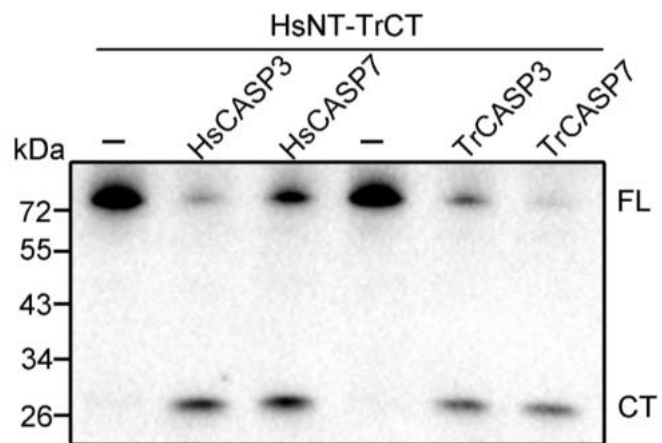

**anti-TrGSDME**

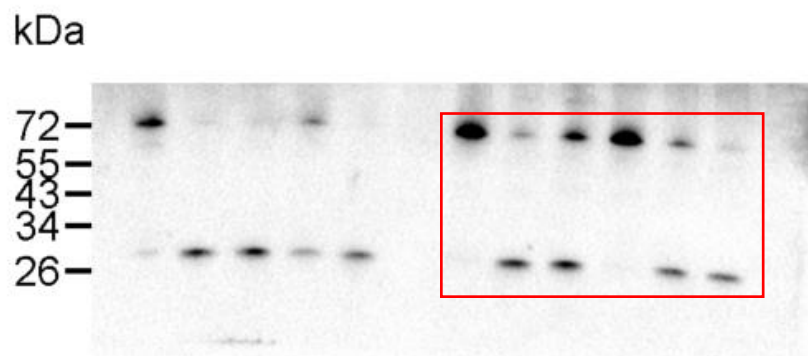

Supplement: fig3-data2 [file elife-89974-fig3-data2-v1.zip]

**Figure 3D**

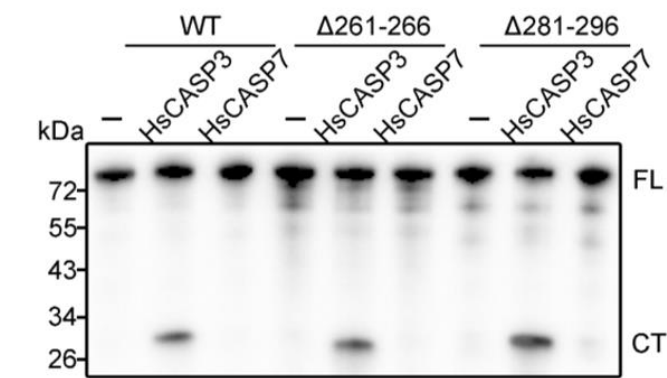

**anti-HsGSDME-CT**

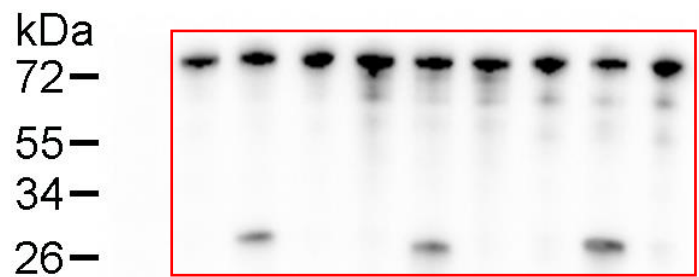

Supplement: fig3-data2 [file elife-89974-fig3-data2-v1.zip]

**Figure 3A**

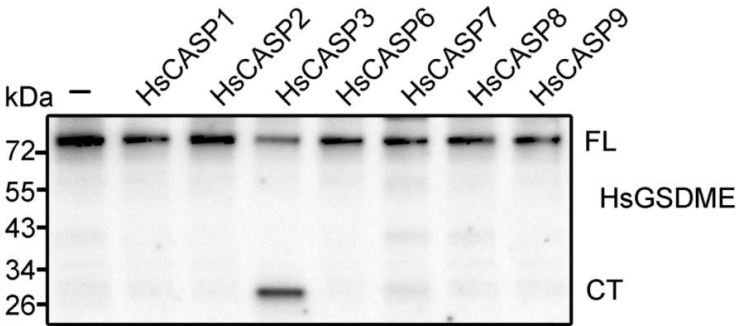

**anti-HsGSDME-CT**

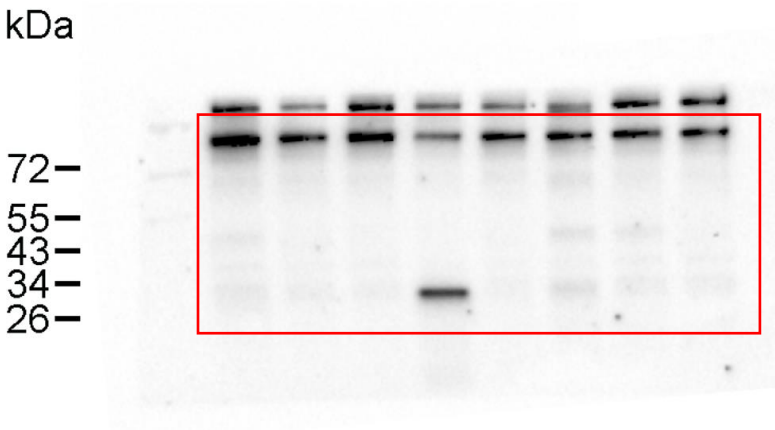

Supplement: fig3-data2 [file elife-89974-fig3-data2-v1.zip]

**Figure 3H**

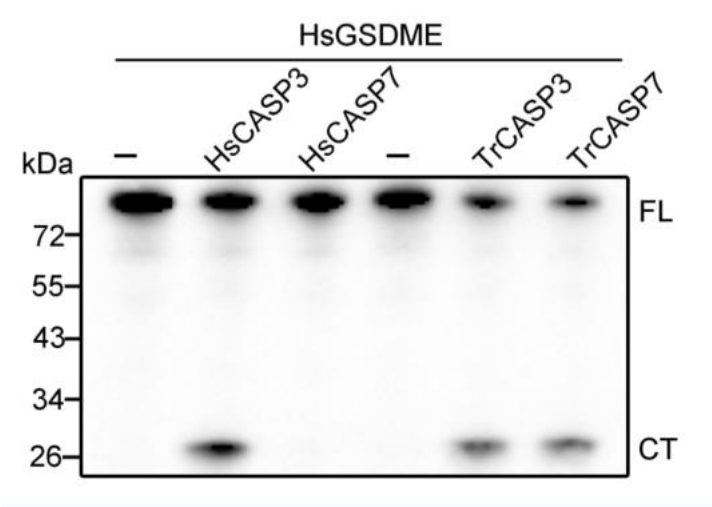

**anti-HsGSDME-CT**

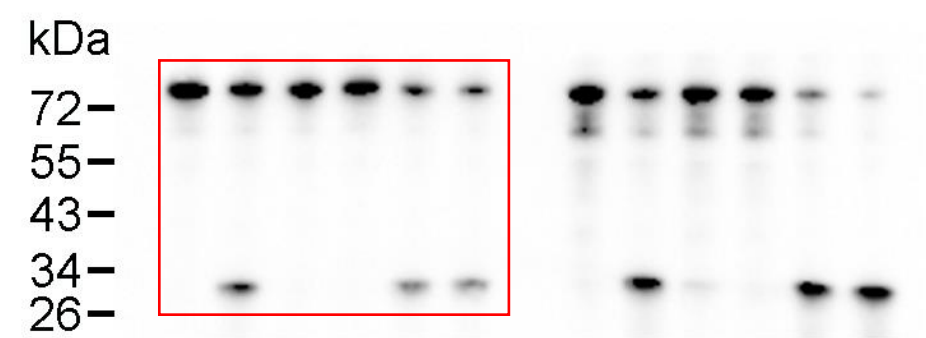

Supplement: fig3-data2 [file elife-89974-fig3-data2-v1.zip]

**Figure 3F**

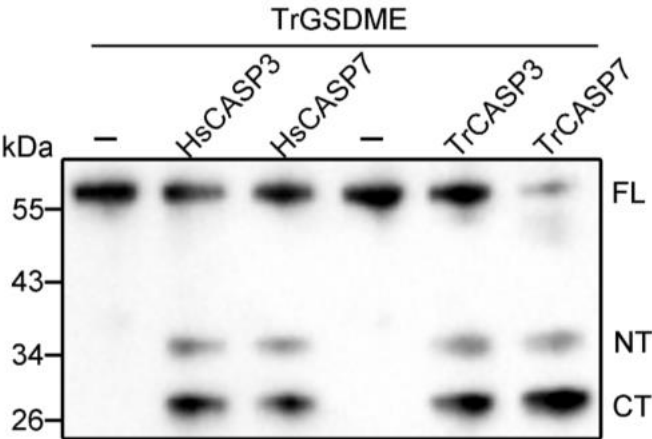

**anti-TrGSDME**

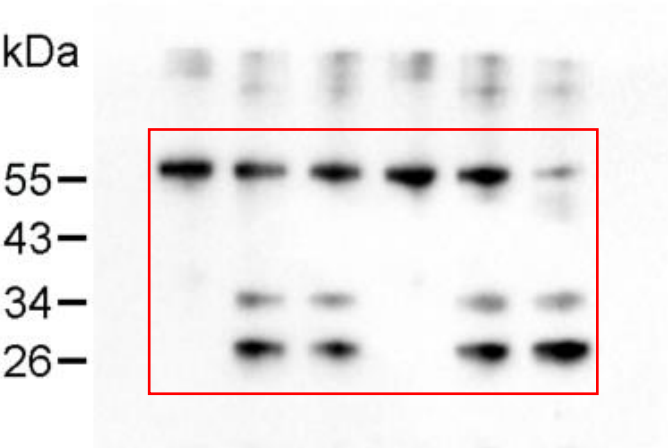

Supplement: fig3-data2 [file elife-89974-fig3-data2-v1.zip]

**Figure 3I**

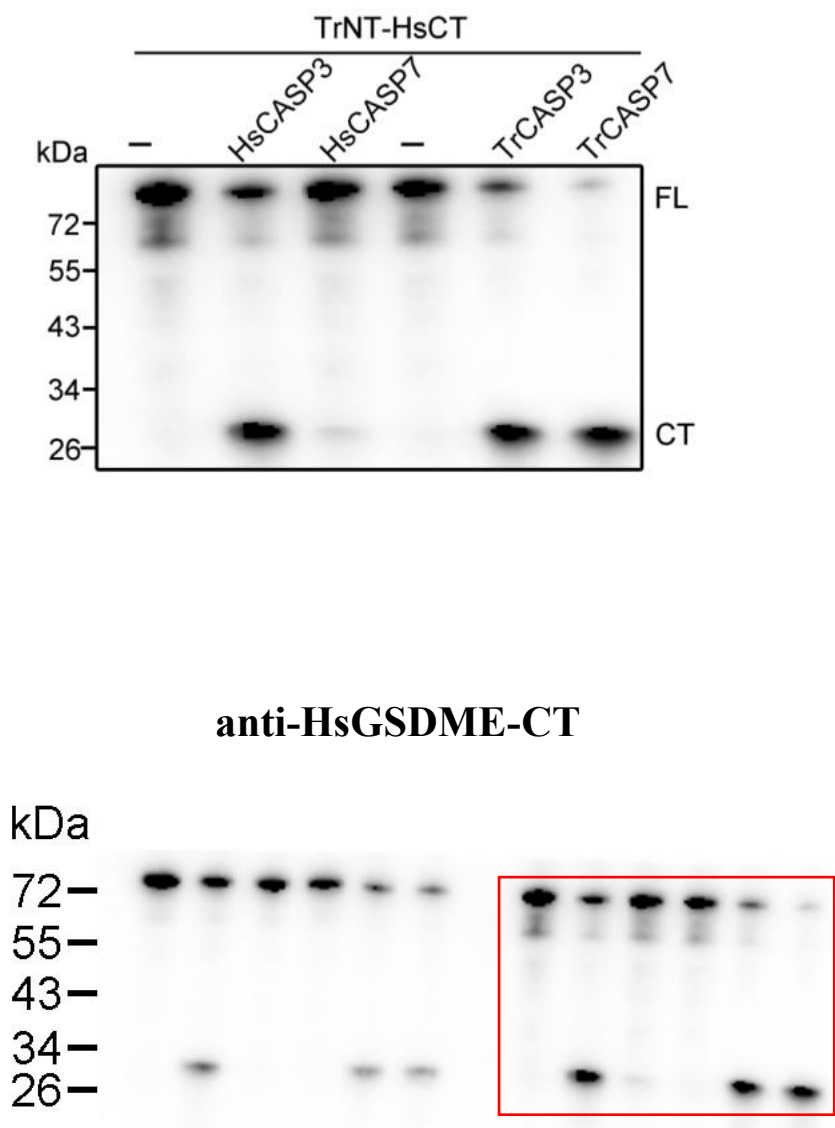

Supplement: fig3-data2 [file elife-89974-fig3-data2-v1.zip]

**Figure 4D**

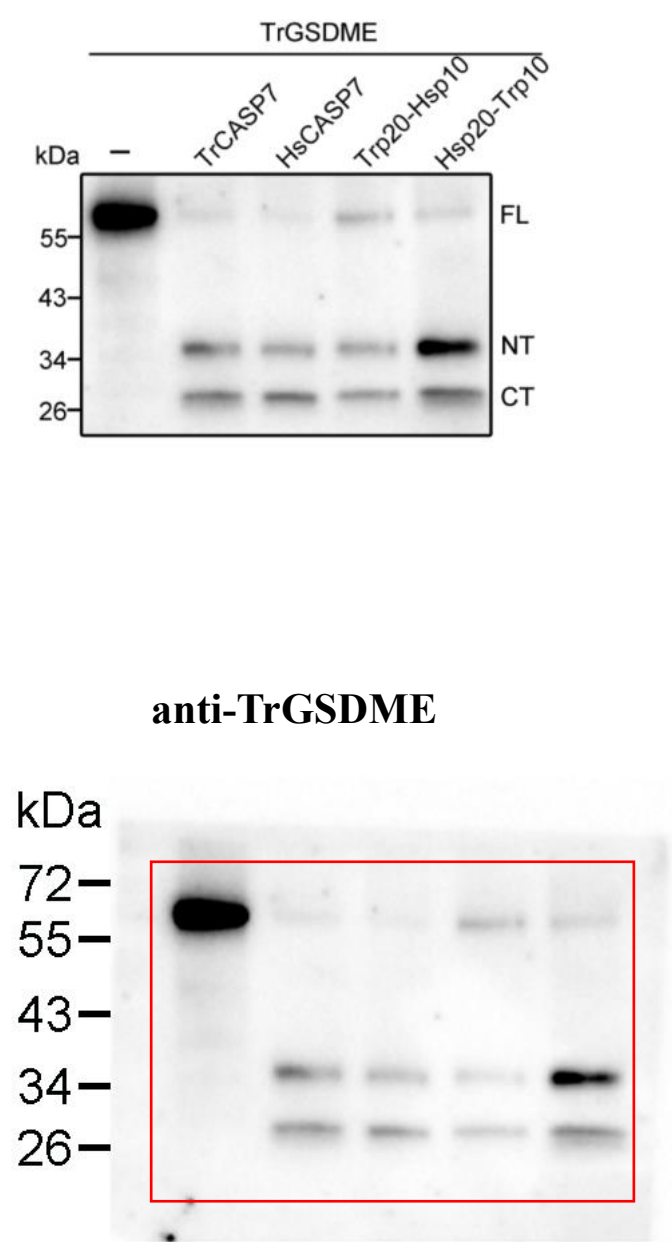

Supplement: fig4-data2 [file elife-89974-fig4-data2-v1.zip]

**Figure 4F**

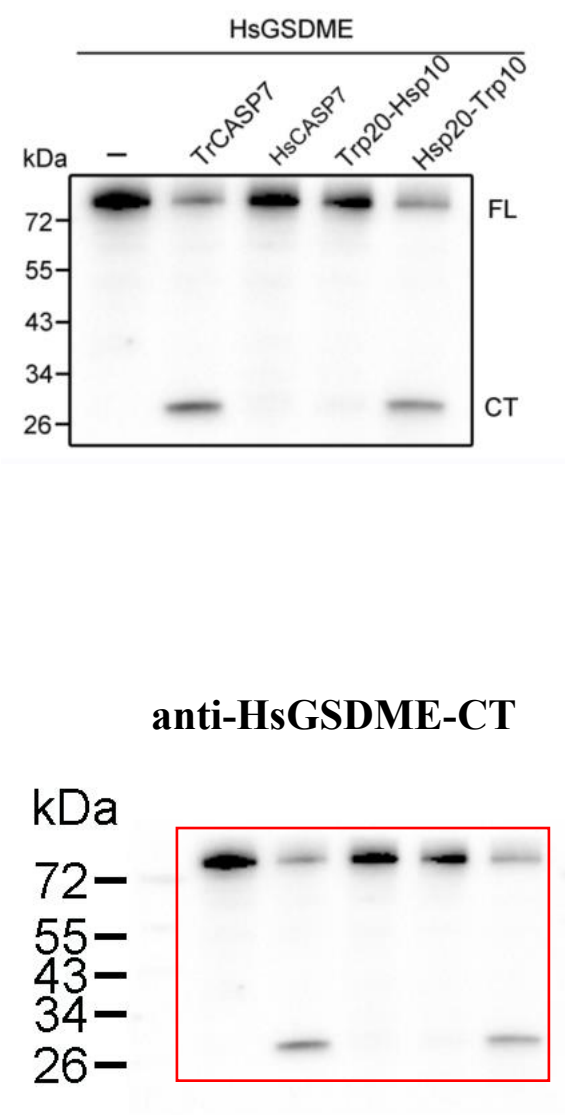

Supplement: fig4-data2 [file elife-89974-fig4-data2-v1.zip]

**Figure 4G**

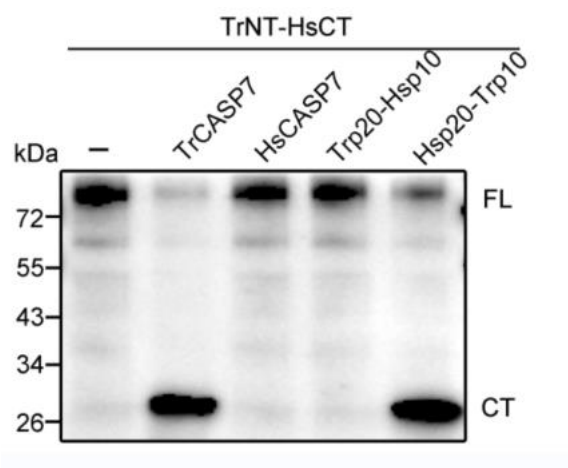

**anti-HsGSDME-CT**

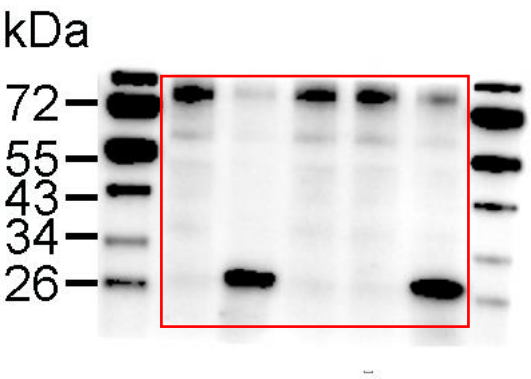

Supplement: fig4-data2 [file elife-89974-fig4-data2-v1.zip]

**Figure 4E**

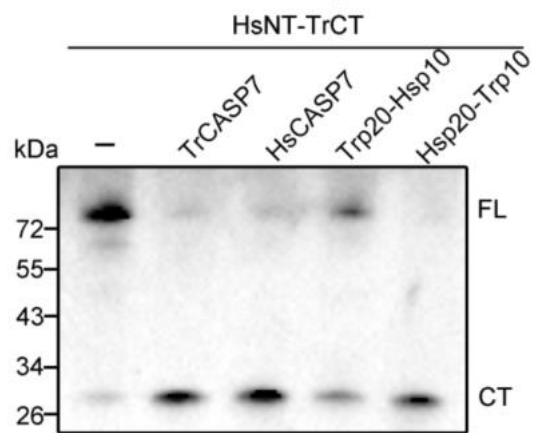

**anti-TrGSDME**

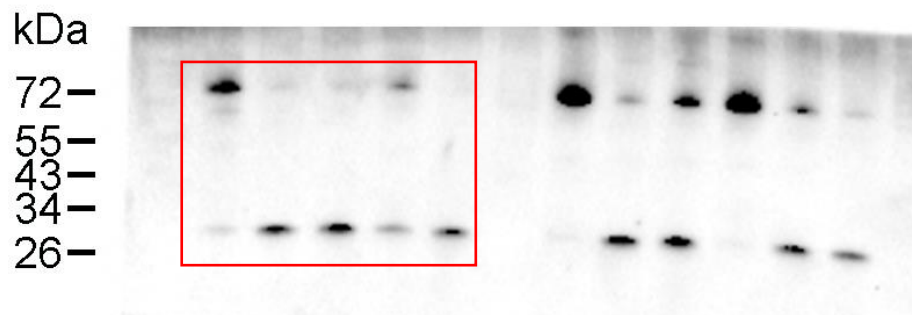

Supplement: fig4-data2 [file elife-89974-fig4-data2-v1.zip]

**Figure 5K**

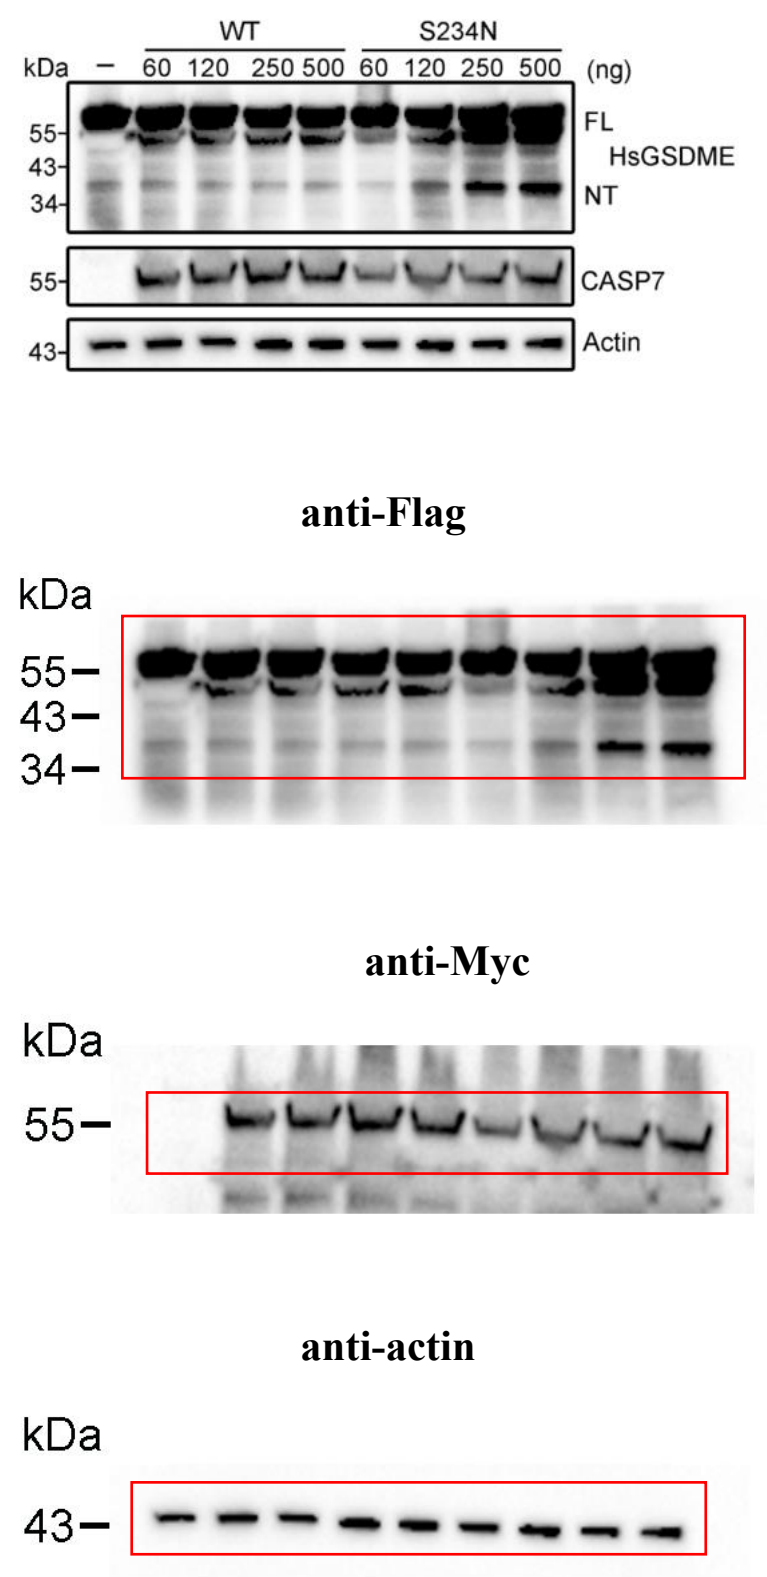

Supplement: fig5-data2 [file elife-89974-fig5-data2-v1.zip]

**Figure 5G**

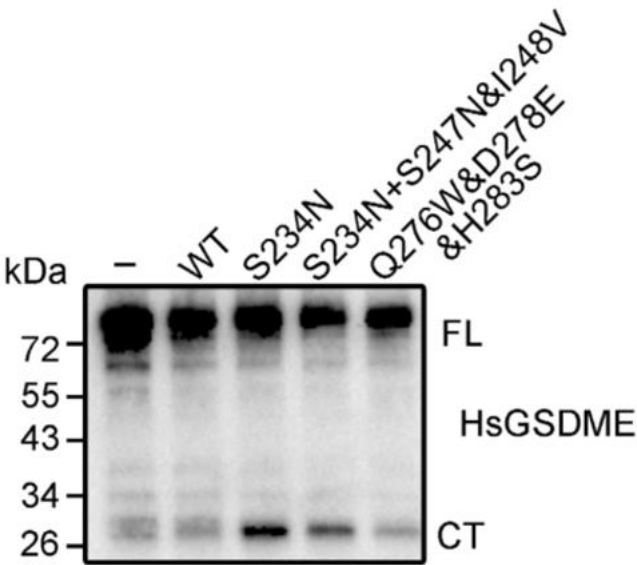

**anti-HsGSDME-CT**

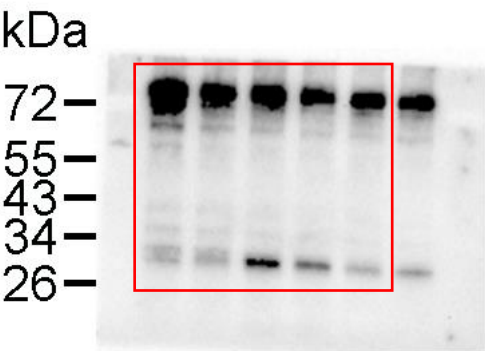

Supplement: fig5-data2 [file elife-89974-fig5-data2-v1.zip]

**Figure 5H**

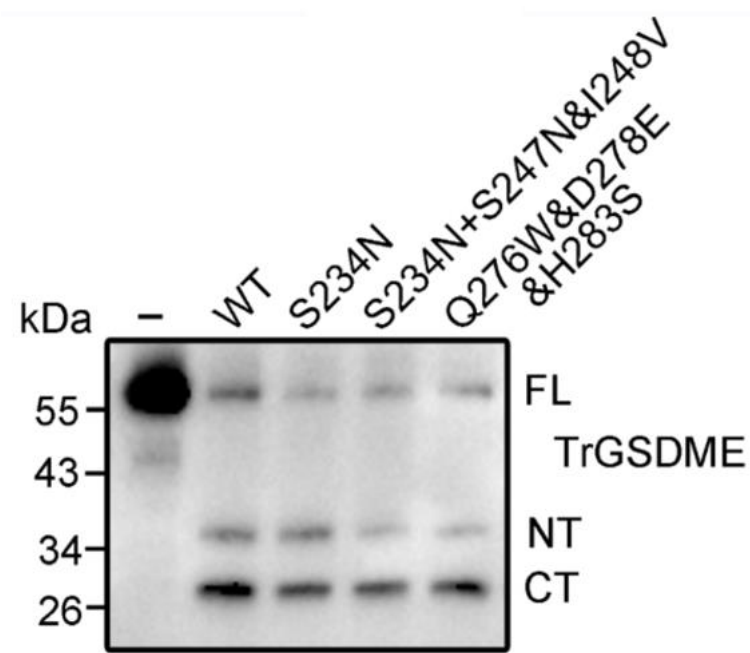

**Anti-TrGSDME**

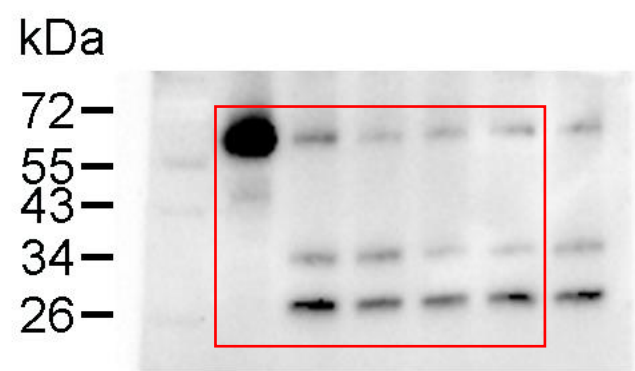

Supplement: fig5-data2 [file elife-89974-fig5-data2-v1.zip]

**Figure 5C**

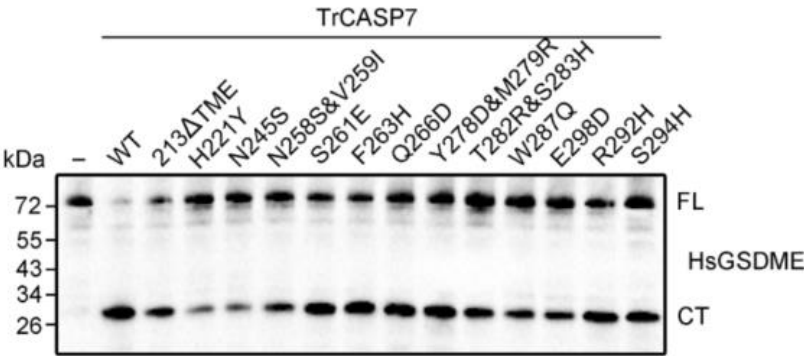

**anti-HsGSDME-CT**

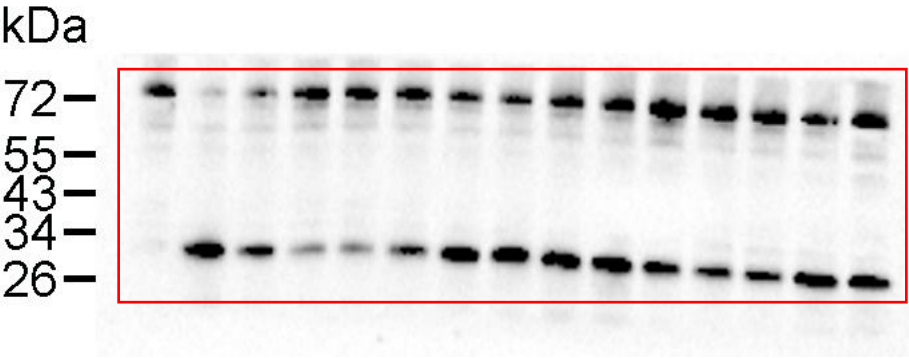

Supplement: fig5-data2 [file elife-89974-fig5-data2-v1.zip]

**Figure 5J**

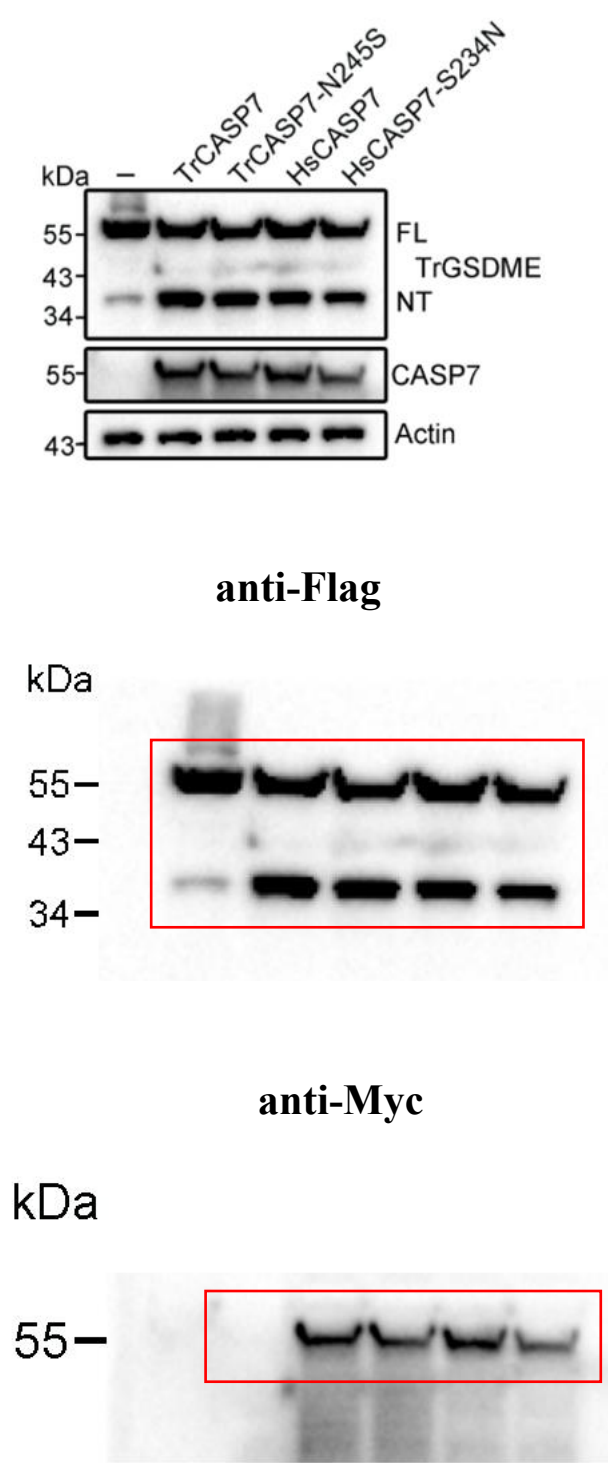

**anti-actin**

kDa

43—

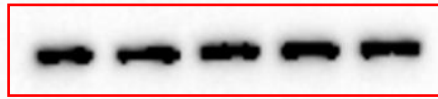

Supplement: fig5-data2 [file elife-89974-fig5-data2-v1.zip]

**Figure 5F**

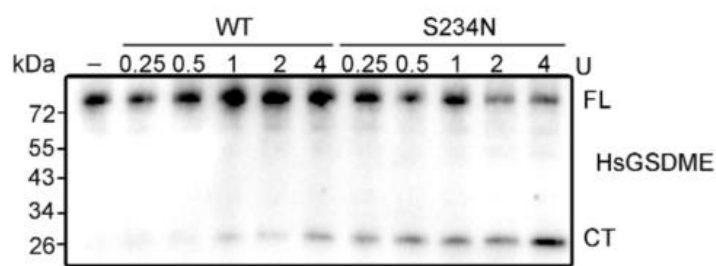

**anti-HsGSDME-CT**

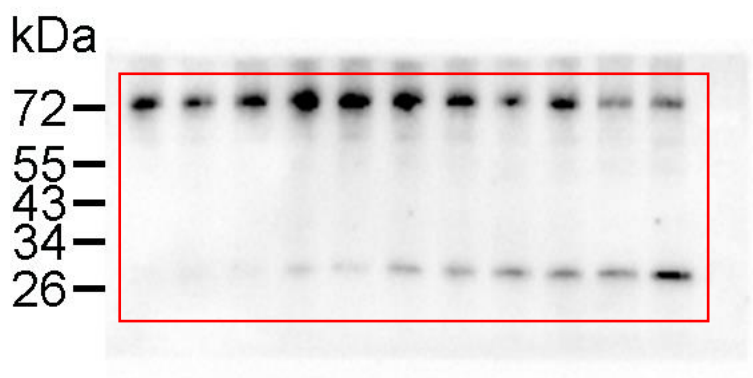

Supplement: fig5-data2 [file elife-89974-fig5-data2-v1.zip]

**Figure 5B**

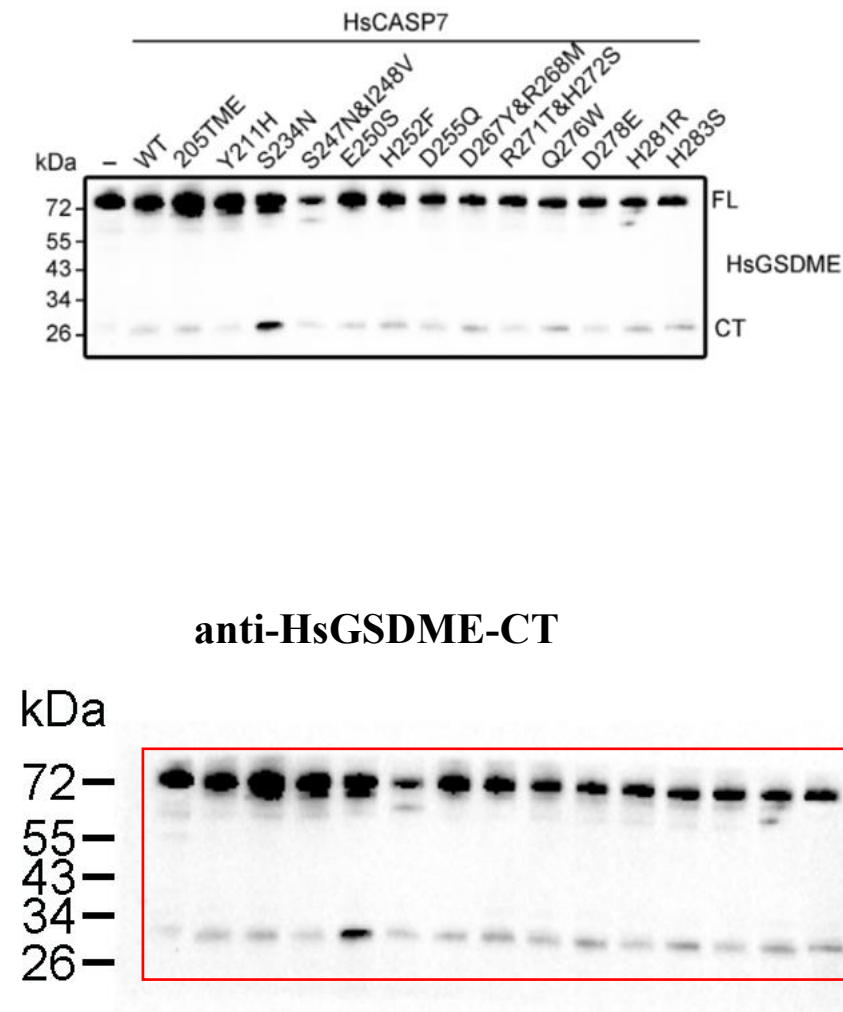

Supplement: fig5-data2 [file elife-89974-fig5-data2-v1.zip]

**Figure 5E**

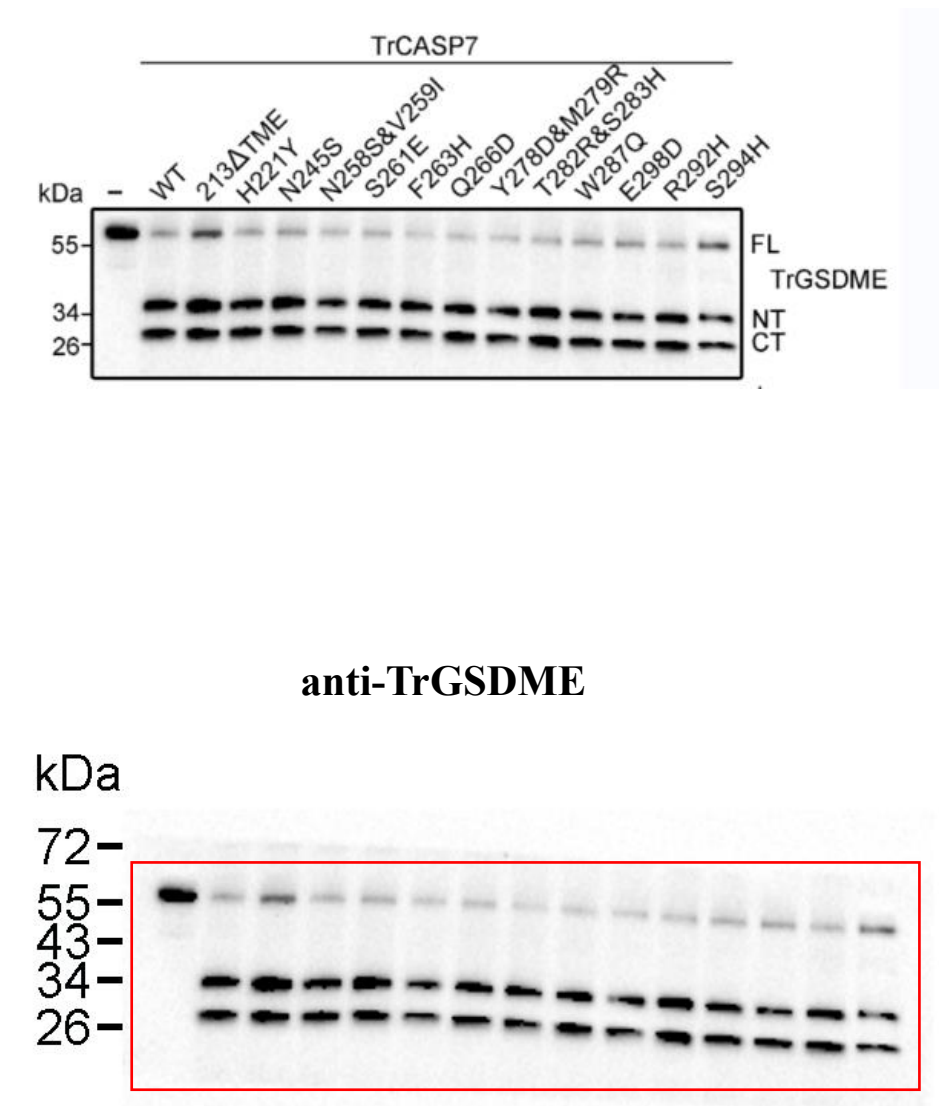

Supplement: fig5-data2 [file elife-89974-fig5-data2-v1.zip]

### Figure 5D

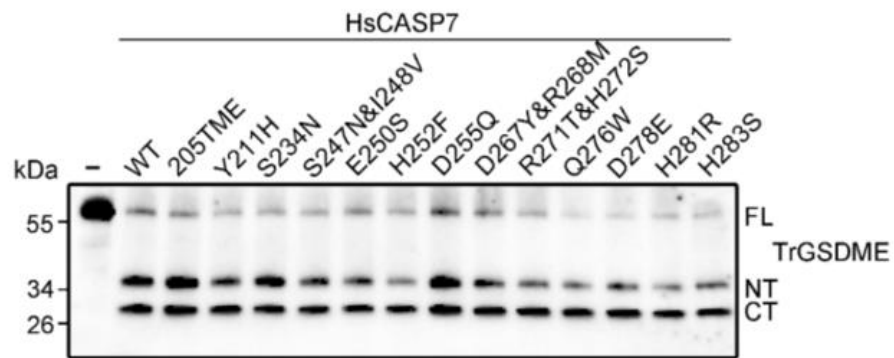

**anti-TrGSDME**

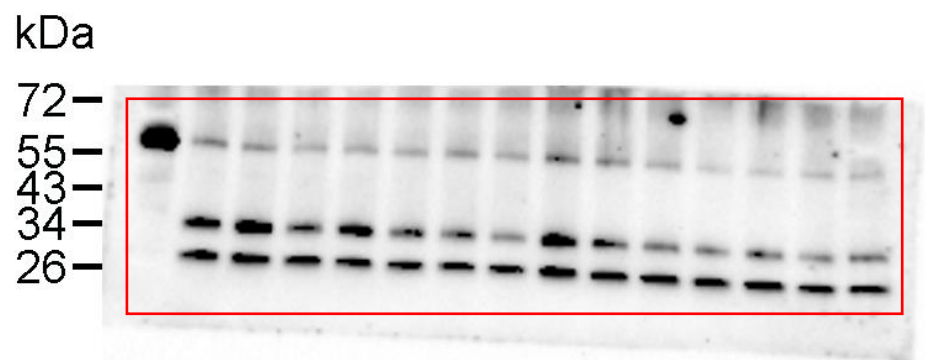

Supplement: fig5-data2 [file elife-89974-fig5-data2-v1.zip]

**Figure 5I**

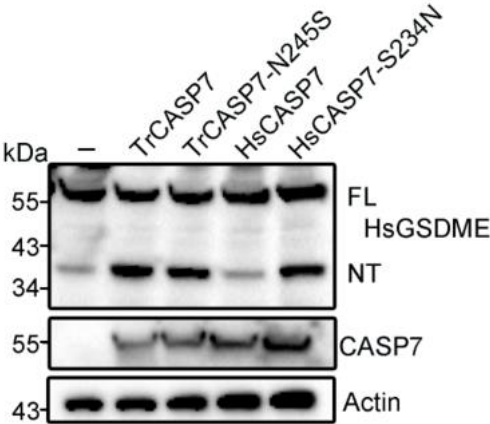

**anti-Flag**

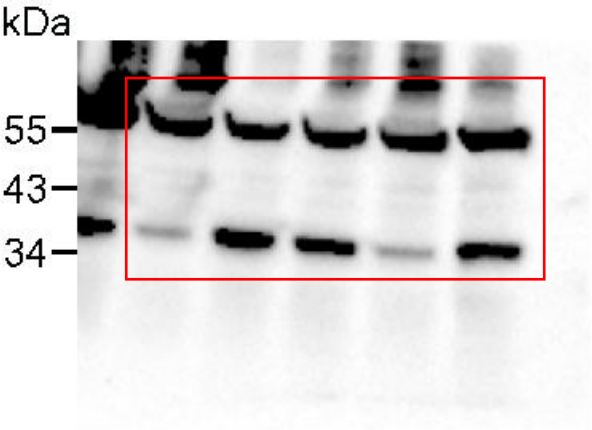

**anti-Myc**

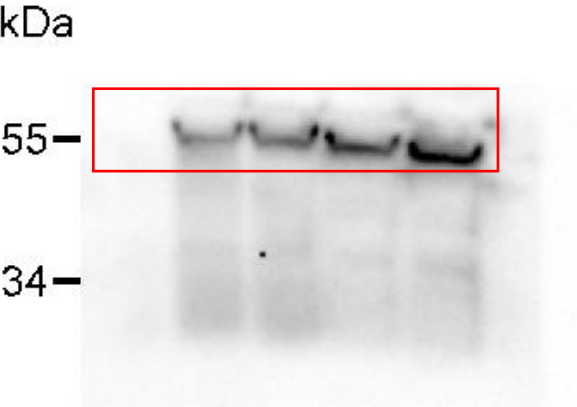

# anti-actin

kDa

43—

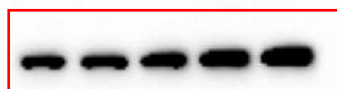

Supplement: fig5-data2 [file elife-89974-fig5-data2-v1.zip]

**Figure 5-figure supplement 3A**

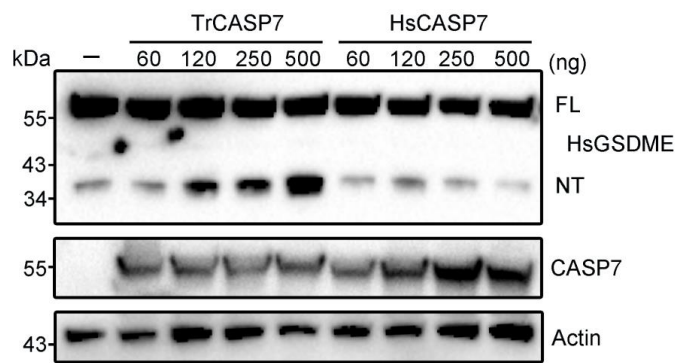

**anti-Flag**

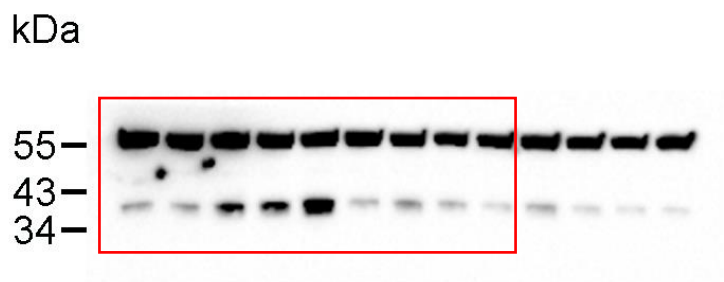

**anti-Myc**

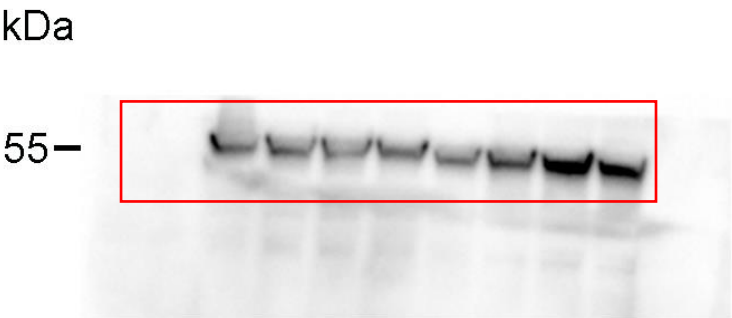

**anti-actin**

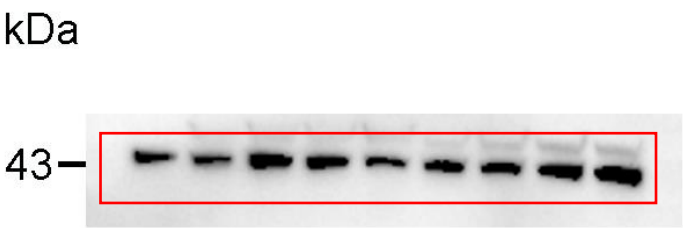

Supplement: fig5-figsupp3-data2 [file elife-89974-fig5-figsupp3-data2-v1.zip]

**Figure 5-figure supplement 3B**

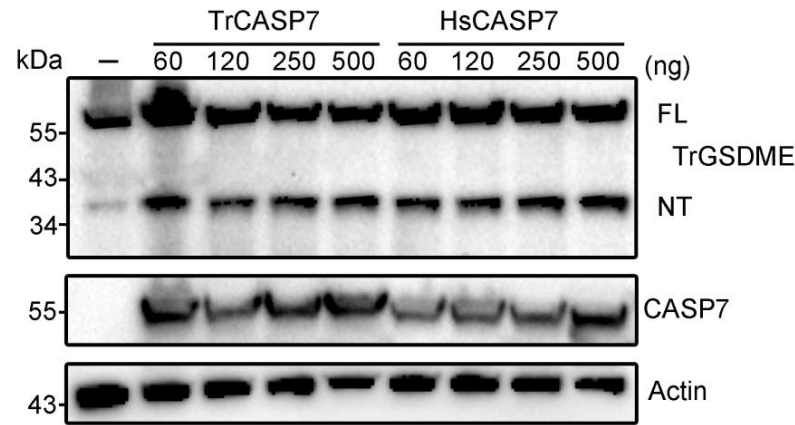

**anti-Flag**

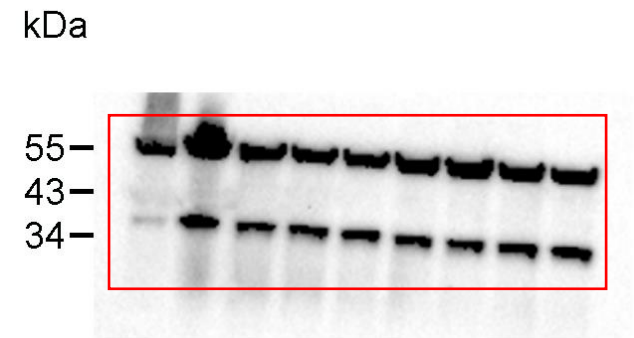

**anti-Myc**

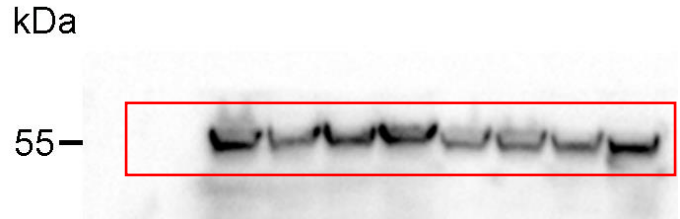

**anti-actin**

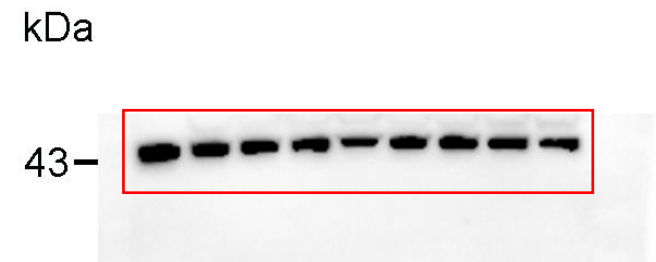

Supplement: fig5-figsupp3-data2 [file elife-89974-fig5-figsupp3-data2-v1.zip]

### Figure 6D

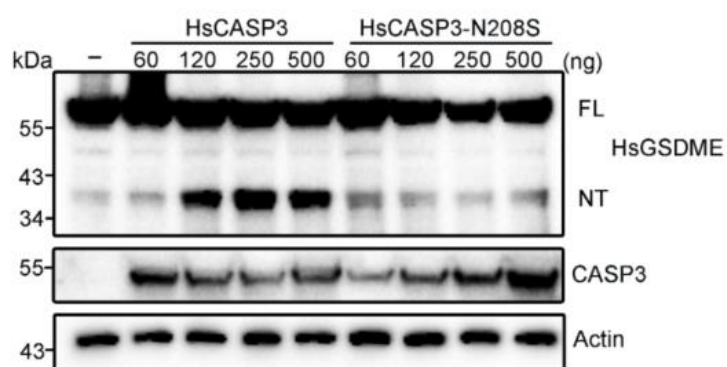

**anti-Flag**

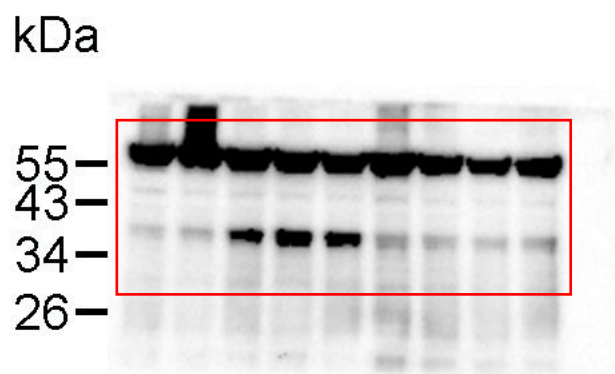

**anti-Myc**

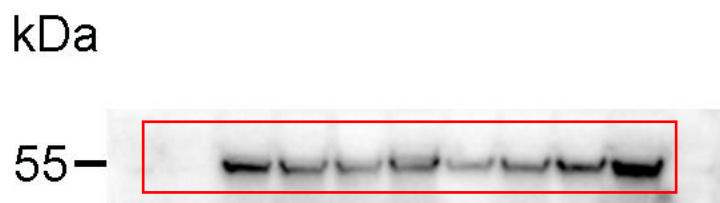

**anti-actin**

kDa

43—

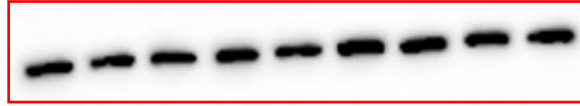

Supplement: fig6-data2 [file elife-89974-fig6-data2-v1.zip]

**Figure 6I**

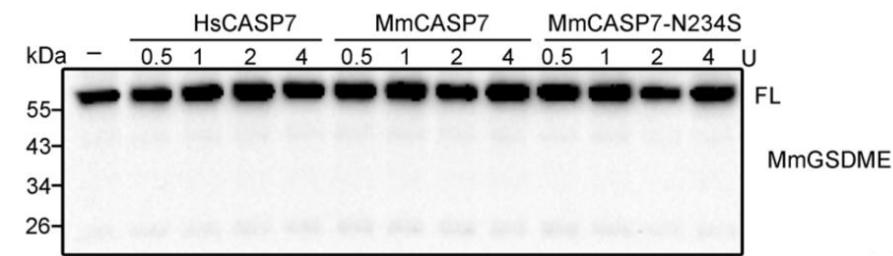

**anti-MmGSDME-CT**

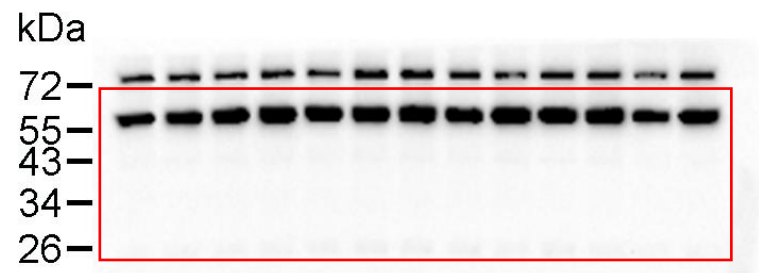

Supplement: fig6-data2 [file elife-89974-fig6-data2-v1.zip]

**Figure 6H**

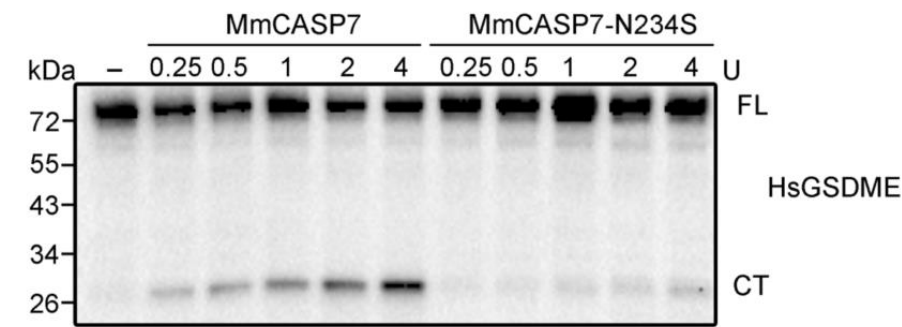

**anti-HsGSDME-CT**

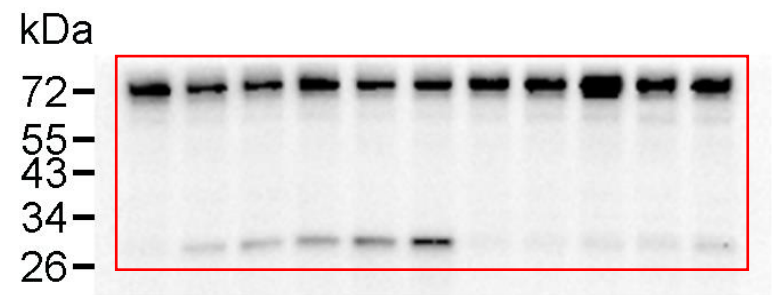

Supplement: fig6-data2 [file elife-89974-fig6-data2-v1.zip]

**Figure 6C**

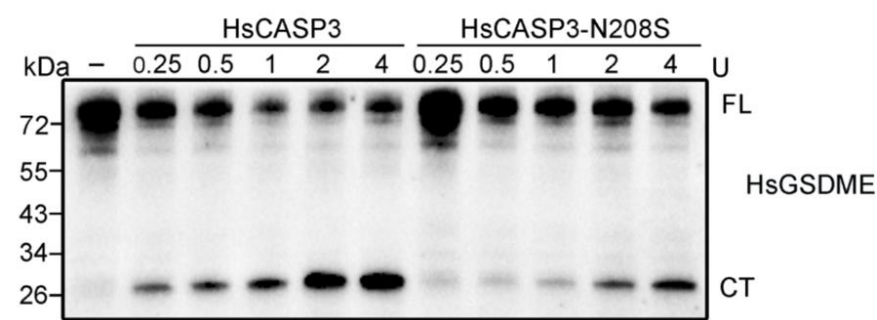

**anti-HsGSDME-CT**

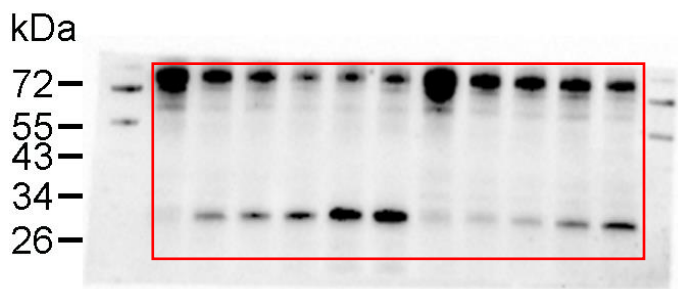

Supplement: fig6-data2 [file elife-89974-fig6-data2-v1.zip]

**Figure 6G**

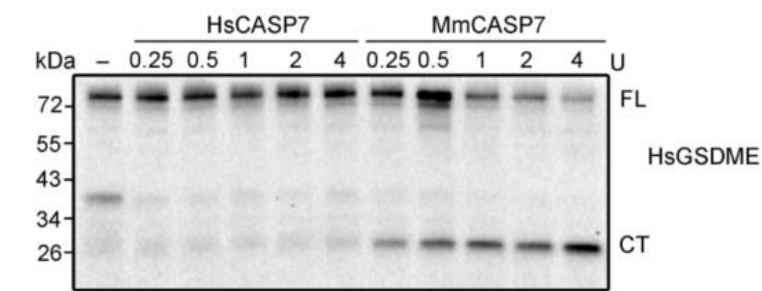

**anti-HsGSDME-CT**

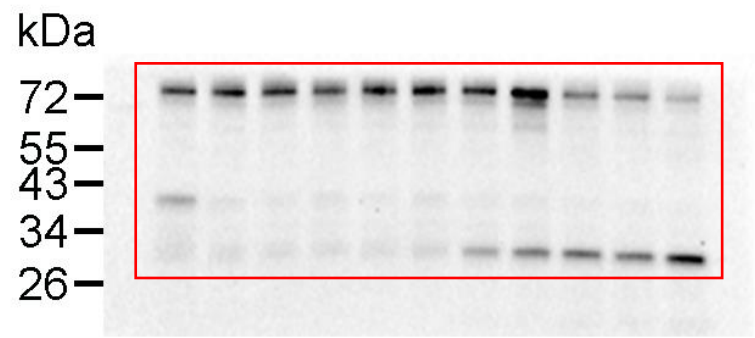

Supplement: fig6-data2 [file elife-89974-fig6-data2-v1.zip]

Figure 6-figure supplement 2A

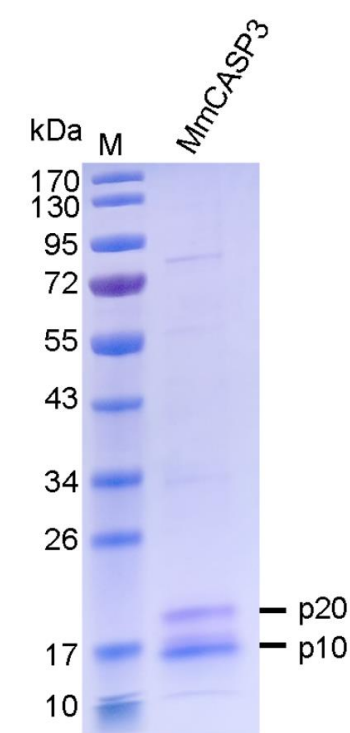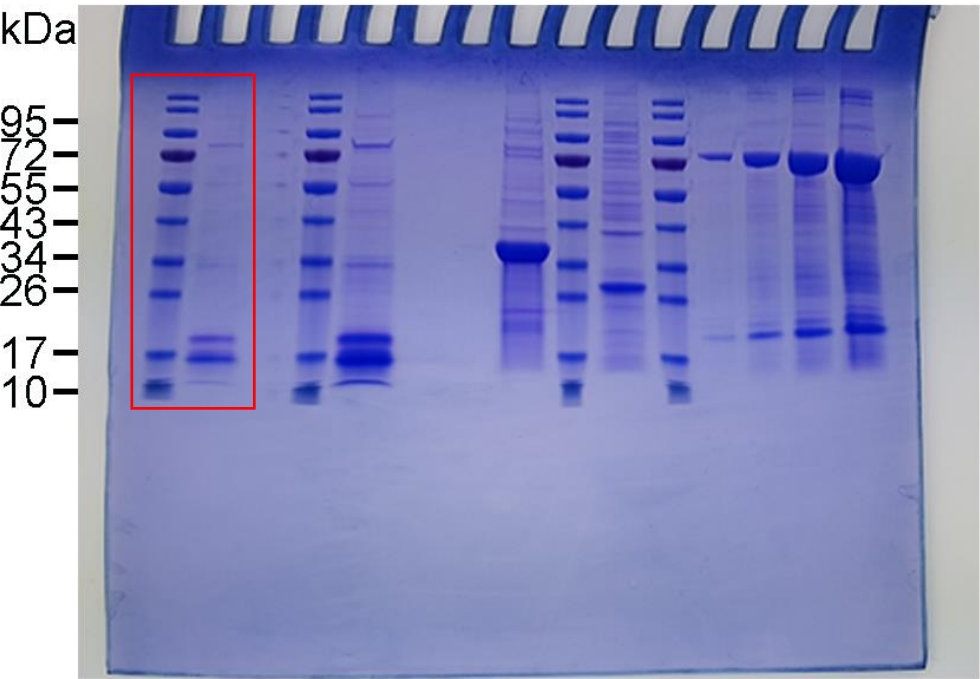

Supplement: fig6-figsupp2-data2 [file elife-89974-fig6-figsupp2-data2-v1.zip]

Figure 6-figure supplement 2B

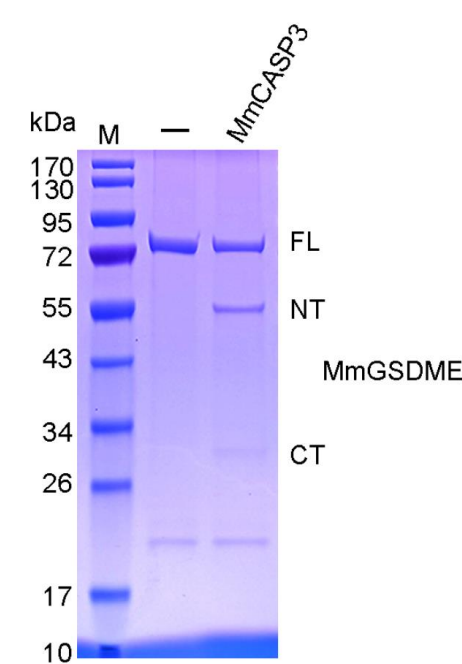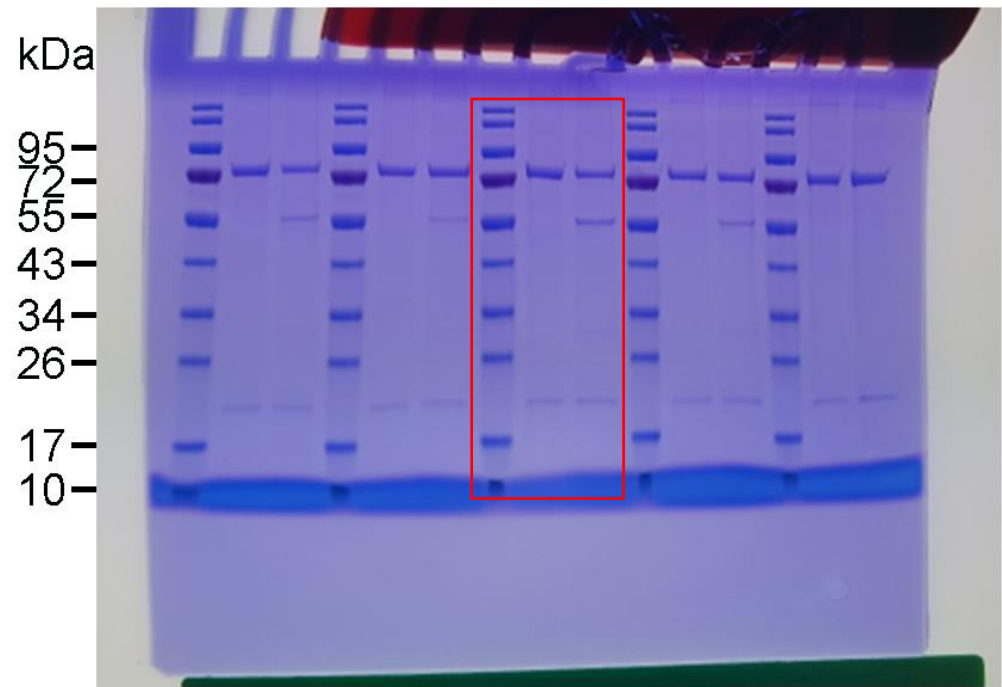

Supplement: fig6-figsupp2-data2 [file elife-89974-fig6-figsupp2-data2-v1.zip]
